# Supplementary material for: Genome-Wide Association Analysis of Autoantibody Positivity in Type 1 Diabetes Cases
Source: PLOS journal article supplement (doi:10.1371/journal.pgen.1002216), 2011-08-04
Supplement: S3 (10.1371/journal.pgen.1002216.s003) [file journal.pgen.1002216.s003]

| SNP        | $p$ -value PCA | $p$ -value sICAM (from [21]) |
|------------|----------------|------------------------------|
| rs10409243 | 0.173          | 5.4e-15                      |
| rs1799969  | 0.974          | 3.6e-47                      |
| rs2116941  | 0.169          | 3.1e-11                      |
| rs2278442  | 0.657          | 3.1e-11                      |
| rs2304237  | 0.766          | 3.9e-13                      |
| rs281440   | 0.31           | 1.5e-16                      |
| rs5498     | 0.55           | 4.8e-25                      |
| rs7256672  | 0.62           | 6.3e-10                      |
| rs7258015  | 0.886          | 2.1e-12                      |
| rs8111930  | 0.387          | 1.3e-18                      |

Table S2: PCA and sICAM association  $P$ -values [21] for SNPs associated with sICAM at a genome-wide significance levels and not located in or near the *ABO* gene. SNPs are taken from Table 1 in [21]. All SNPs are located in the 19p13.2 chromosome region.
